# Supplementary material for: Host-Derived Delta-Like Canonical Notch Ligand 1 as a Novel Diagnostic Biomarker for Bacterial Sepsis—Results From a Combinational Secondary Analysis
Source: PubMed Central journal article supplement (PMC6663974; doi:10.3389/fcimb.2019.00267), 2019-07-23
Supplement: Image_1.pdf [file Image_1.pdf]

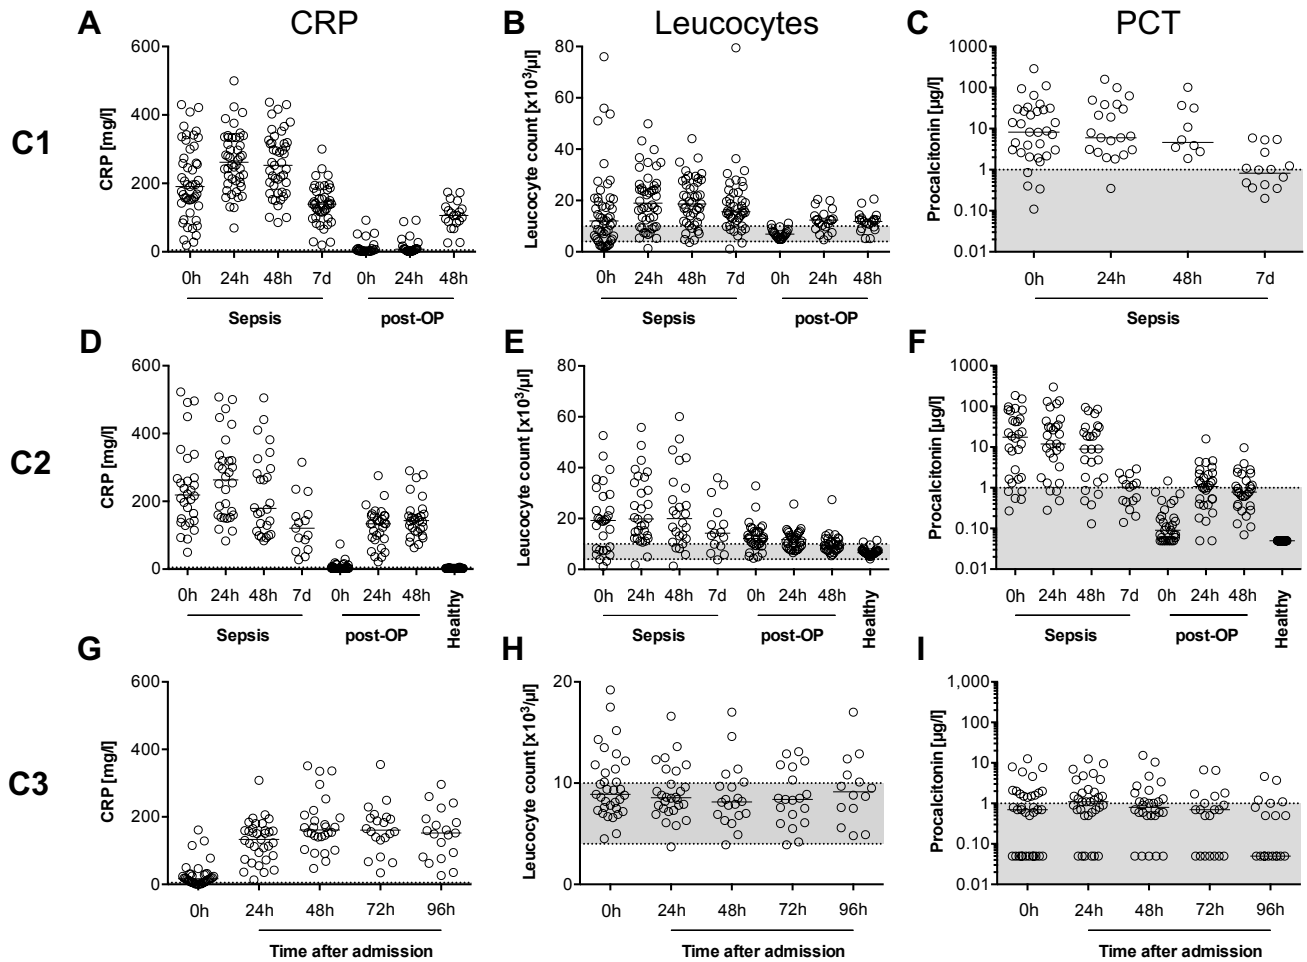

**Supplementary figure 1:** Distribution of routine biomarker values in the study cohorts. (A) - (C) Cohort 1, (D) - (F) Cohort 2, (G) - (I) Cohort 3. For each biomarker, the reference range was incorporated into the figures as grey fill between dashed line:  $< 5 \text{ mg/l}$  for CRP (A, D, G),  $4 - 10 \times 10^3$  leucocytes/ $\mu\text{l}$  (B, E, H),  $< 1 \mu\text{g/l}$  for PCT (C, F, I). C1-3: Cohort 1-3.
