# Supplementary material for: Host-Derived Delta-Like Canonical Notch Ligand 1 as a Novel Diagnostic Biomarker for Bacterial Sepsis—Results From a Combinational Secondary Analysis
Source: PubMed Central journal article supplement (PMC6663974; doi:10.3389/fcimb.2019.00267), 2019-07-23
Supplement: Image_3.pdf [file Image_3.pdf]

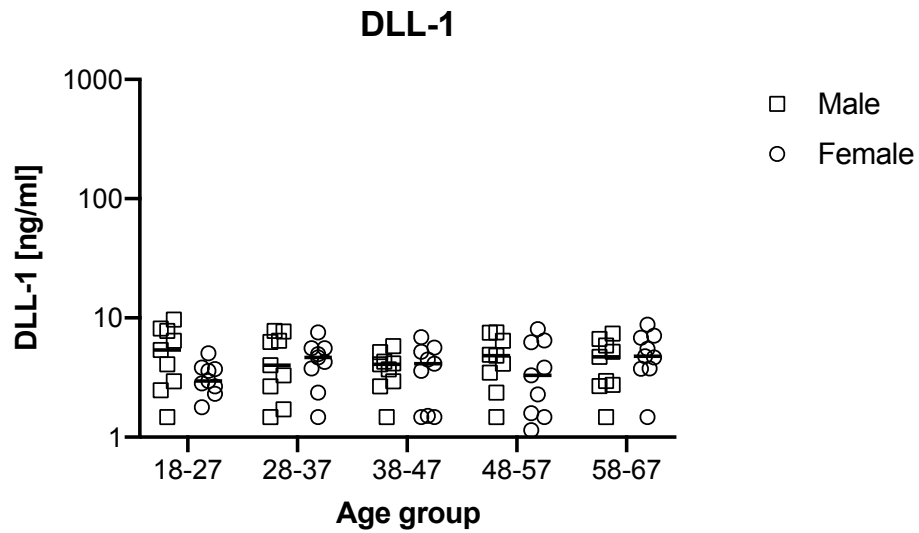

**Supplementary figure 3:** Distribution of sDLL1 plasma concentrations within the healthy donor cohort, grouped for age groups and sex.
