# Supplementary material for: Host-Derived Delta-Like Canonical Notch Ligand 1 as a Novel Diagnostic Biomarker for Bacterial Sepsis—Results From a Combinational Secondary Analysis
Source: PubMed Central journal article supplement (PMC6663974; doi:10.3389/fcimb.2019.00267), 2019-07-23
Supplement: Image_4.pdf [file Image_4.pdf]

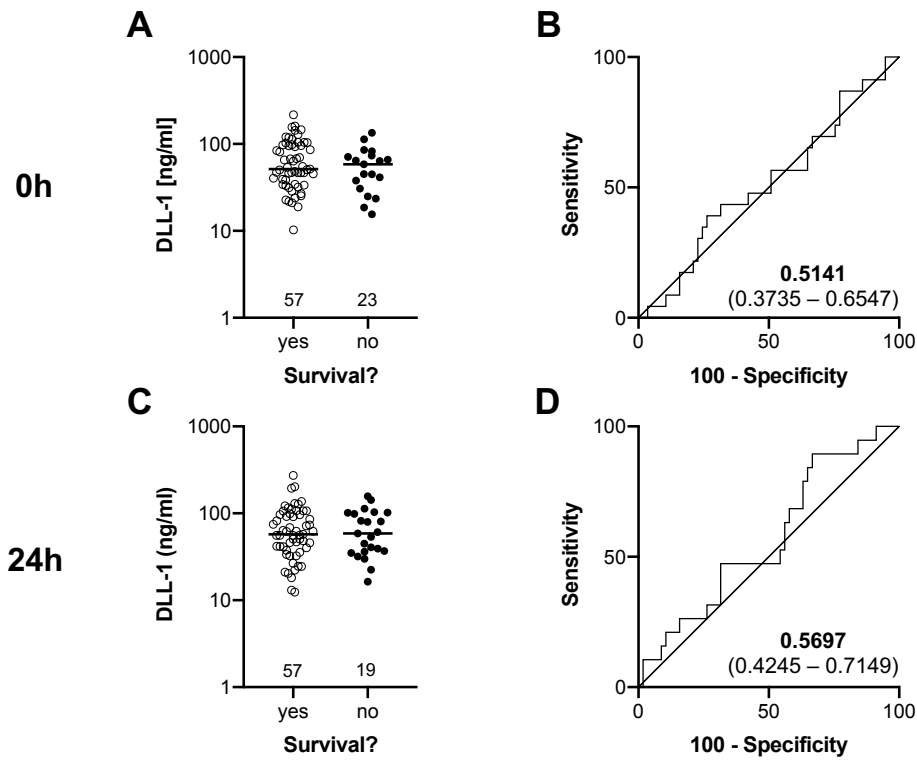

**Supplementary figure 4:** Prognostic value of plasma DLL1. Plasma concentrations of DLL1 at Onset (A) or 24h (C), grouped for 28-day survival. Horizontal line represents median, numbers indicate patients in analysis. Results of AUROC analysis at Onset (B) or 24h (D) for 28-day survival. Numbers indicate AUC (with 95% confidence interval).
