# Supplementary material for: Host-Derived Delta-Like Canonical Notch Ligand 1 as a Novel Diagnostic Biomarker for Bacterial Sepsis—Results From a Combinational Secondary Analysis
Source: PubMed Central journal article supplement (PMC6663974; doi:10.3389/fcimb.2019.00267), 2019-07-23
Supplement: Table_1.pdf [file Table_1.pdf]

- 1 **Supplementary table 1:** Plasma DLL-1 concentrations in patients and volunteers of studied cohorts  
 2 over time. All values are given in ng/ml. CI: 95% confidence interval. Post-OP: postoperative.

| Cohort 1  |        |       |       |       |         |       |       |         |
|-----------|--------|-------|-------|-------|---------|-------|-------|---------|
|           | Sepsis |       |       |       | Post-OP |       |       | Healthy |
| Timepoint | 0h     | 24h   | 48h   | 7d    | 0h      | 24h   | 48h   |         |
| n=        | 30     | 30    | 27    | 14    | 30      | 29    | 28    | 30      |
| Median    | 56.52  | 48.69 | 47.19 | 34.32 | 13.62   | 14.25 | 17.38 | 12.12   |
| CI low    | 47.82  | 41.82 | 39.77 | 28.57 | 12.39   | 14.54 | 15.50 | 10.65   |
| CI up     | 72.77  | 64.23 | 59.21 | 50.93 | 16.00   | 24.57 | 19.94 | 13.21   |
| Cohort 2  |        |       |       |       |         |       |       |         |
|           | Sepsis |       |       |       | Post-OP |       |       | Healthy |
| Timepoint | 0h     | 24h   | 48h   | 7d    | 0h      | 24h   | 48h   |         |
| n=        | 50     | 46    | 44    | 40    | 20      | 20    | 20    | 20      |
| Median    | 60.54  | 64.73 | 58.11 | 37.38 | 12.83   | 15.21 | 9.21  | 8.22    |
| CI low    | 62.60  | 61.46 | 51.60 | 36.73 | 11.28   | 13.41 | 7.18  | 7.67    |
| CI up     | 92.23  | 88.03 | 78.93 | 58.35 | 15.82   | 18.96 | 13.00 | 10.06   |
| Cohort 3  |        |       |       |       |         |       |       |         |
|           | Trauma |       |       |       |         |       |       |         |
| Timepoint | 0h     | 24h   | 48h   | 72h   | 96h     |       |       |         |
| n=        | 36     | 34    | 29    | 21    | 19      |       |       |         |
| Median    | 16.44  | 17.15 | 17.61 | 16.72 | 17.01   |       |       |         |
| CI low    | 16.23  | 16.64 | 15.87 | 15.52 | 14.48   |       |       |         |
| CI up     | 20.07  | 20.27 | 20.60 | 20.11 | 19.71   |       |       |         |
